# Supplementary material for: MALDI-IHC-Guided In-Depth Spatial Proteomics: Targeted and Untargeted MSI Combined
Source: PubMed Central journal article supplement (PMC9893213; doi:10.1021/acs.analchem.2c04220), 2023-01-13
Supplement: ac2c04220_si_001.pdf [file ac2c04220_si_001.pdf]

## Supplementary information:

### MALDI-IHC guided in-depth spatial proteomics: targeted and untargeted MSI combined.

Britt S.R. Claes<sup>1#</sup>, Kasper K. Krestensen<sup>1#</sup>, Gargey Yagnik<sup>2</sup>, Andrej Grgic<sup>1</sup>, Christel Kuik<sup>1</sup>, Mark J. Lim<sup>2</sup>, Kenneth J. Rothschild<sup>2,3</sup>, Michiel Vandenbosch<sup>1</sup>, Ron M.A. Heeren<sup>1\*</sup>

<sup>1</sup>The Maastricht MultiModal Molecular Imaging (M4I) institute, Division of Imaging Mass Spectrometry (IMS), Maastricht University, 6229 ER Maastricht, The Netherlands

<sup>2</sup>AmberGen, Inc., 44 Manning Road, Billerica, Massachusetts 01821, United States.

<sup>3</sup>Molecular Biophysics Laboratory, Department of Physics and Photonics Center, Boston University, Boston, Massachusetts 02215, United States

# These authors have equally contributed

\* Corresponding author:

Prof. Ron M.A. Heeren

Email: [r.heeren@maastrichtuniversity.nl](mailto:r.heeren@maastrichtuniversity.nl)

### Table of Contents

|                                                                                                                  |    |
|------------------------------------------------------------------------------------------------------------------|----|
| <b>Table S1:</b> FFPE breast cancer sample information (OriGene).....                                            | S2 |
| <b>Table S2:</b> Antibody panel information .....                                                                | S2 |
| <b>Figure S1:</b> Untargeted peptide MSI showed specific peptide distributions.....                              | S3 |
| <b>Figure S2:</b> Single-pixel spectrum of the MALDI-IHC experiment on the Rapiflex at 10x10 $\mu\text{m}$ ..... | S3 |
| <b>Figure S3:</b> Multiplex MALDI-IHC on the rapifleX at 5x5 $\mu\text{m}$ spatial resolution. ....              | S4 |
| <b>Figure S4:</b> Comparison of HER2 fluorescent and MALDI-IHC images from the same tissue section .....         | S5 |
| <b>Figure S5:</b> MALDI-IHC guided LMD overview .....                                                            | S5 |
| <b>Figure S6:</b> Venn diagram of the number of peaks detected with the different bottom-up approaches.....      | S6 |

**Table S1:** FFPE breast cancer sample information (OriGene).

| Information                                  | Patient 1 FR5B34765F                                                            | Patient 2 FR5B3391A2                                           |
|----------------------------------------------|---------------------------------------------------------------------------------|----------------------------------------------------------------|
| PR status                                    | +                                                                               | -                                                              |
| ER status                                    | +                                                                               | -                                                              |
| HER2 status                                  | -                                                                               | +                                                              |
| HER2 strength                                | N.A.                                                                            | Strong                                                         |
| Age                                          | 61                                                                              | 57                                                             |
| Gender                                       | Female                                                                          | Female                                                         |
| Sample type                                  | FFPE block                                                                      | FFPE block                                                     |
| Tissue origin/finding                        | Breast / Lymph node, axillary                                                   | Breast / Breast                                                |
| Sample pathology from pathology verification | Adenocarcinoma of breast, ductal, lobular, metastatic                           | Adenocarcinoma of breast, ductal                               |
| Tumor grade                                  | Nottingham G2: 6-7 points<br>Intermediate combined grade (moderately favorable) | Nottingham G3: 8-9 points<br>High combined grade (unfavorable) |
| TNM                                          | T2N2aMX                                                                         | pT2pN0pMX                                                      |
| Minimum stage grouping                       | IIIA                                                                            | IIA                                                            |
| % Normal                                     | 5                                                                               | 3                                                              |
| % Lesion                                     | 0                                                                               | 0                                                              |
| % Tumor                                      | 95                                                                              | 85                                                             |
| % Tumor hypercellular stroma                 | 0                                                                               | 0                                                              |
| % Tumor hypo/acellular stroma                | 0                                                                               | 2                                                              |
| % Necrosis                                   | 0                                                                               | 10                                                             |
| Race/Ethnicity                               | White or Caucasian                                                              | Not reported                                                   |

**Table S2:** Antibody panel information used for the MALDI-IHC experiments.

| Binding agent/<br>Fluorophore          | Lot#     | Quantity<br>(conc.)              | PC-MT<br>(Da) | Binding<br>Agent<br>Vendor | Binding<br>Agent<br>Catalog | Species<br>Reactivity |
|----------------------------------------|----------|----------------------------------|---------------|----------------------------|-----------------------------|-----------------------|
| Actin- $\alpha$ SM / No<br>Fluorophore | L2100055 | 12.5 $\mu$ g<br>(298 $\mu$ g/mL) | 1,194.66      | ABCAM                      | ab220795                    | M, Rat, H             |
| HER2 / DyLight<br>650                  | L2100034 | 12.5 $\mu$ g<br>(305 $\mu$ g/mL) | 1,210.74      | ABCAM                      | ab251602                    | H                     |
| CD68 / No<br>Fluorophore               | L2100052 | 12.5 $\mu$ g<br>(400 $\mu$ g/mL) | 1,216.75      | ABCAM                      | ab227458                    | H                     |
| Vimentin / No<br>Fluorophore           | L2100041 | 12.5 $\mu$ g<br>(316 $\mu$ g/mL) | 1,230.84      | ABCAM                      | ab193555                    | M, Rat, H,<br>AGM     |
| PanCK / No<br>Fluorophore              | L2100043 | 12.5 $\mu$ g<br>(387 $\mu$ g/mL) | 1,638.87      | ABCAM                      | ab264485                    | M, Rat, H             |
| CD20 / No<br>Fluorophore               | L2100062 | 12.5 $\mu$ g<br>(260 $\mu$ g/mL) | 997.53        | ABCAM                      | ab214282                    | H                     |

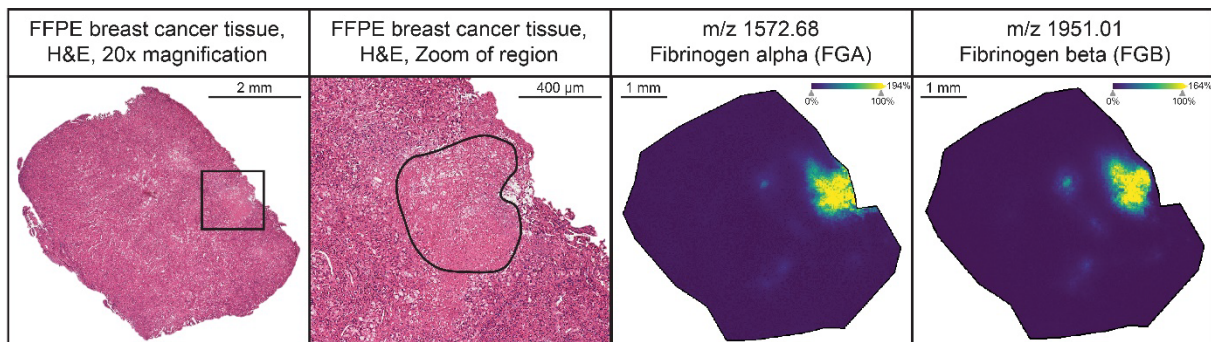

**Figure S1:** Untargeted peptide MSI showed specific peptide distributions within the necrotic area of the FFPE breast cancer tissue (based on the H&E, left) such as  $m/z$  1572.68 and  $m/z$  1951.01 (right), corresponding to fibrinogen alpha (FGA) and fibrinogen beta (FGB), respectively. The H&E was performed on a consecutive section.

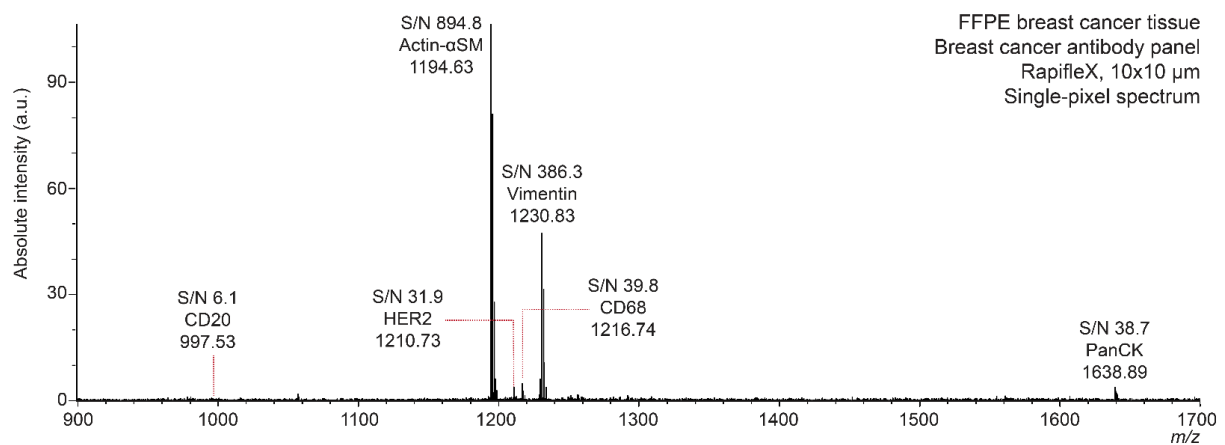

**Figure S2:** Single-pixel spectrum of the MALDI-IHC experiment on the rapifleX at 10x10  $\mu$ m. The spectrum was TIC normalized in FlexImaging and exported to mMass, where peaks were picked and baseline corrected.

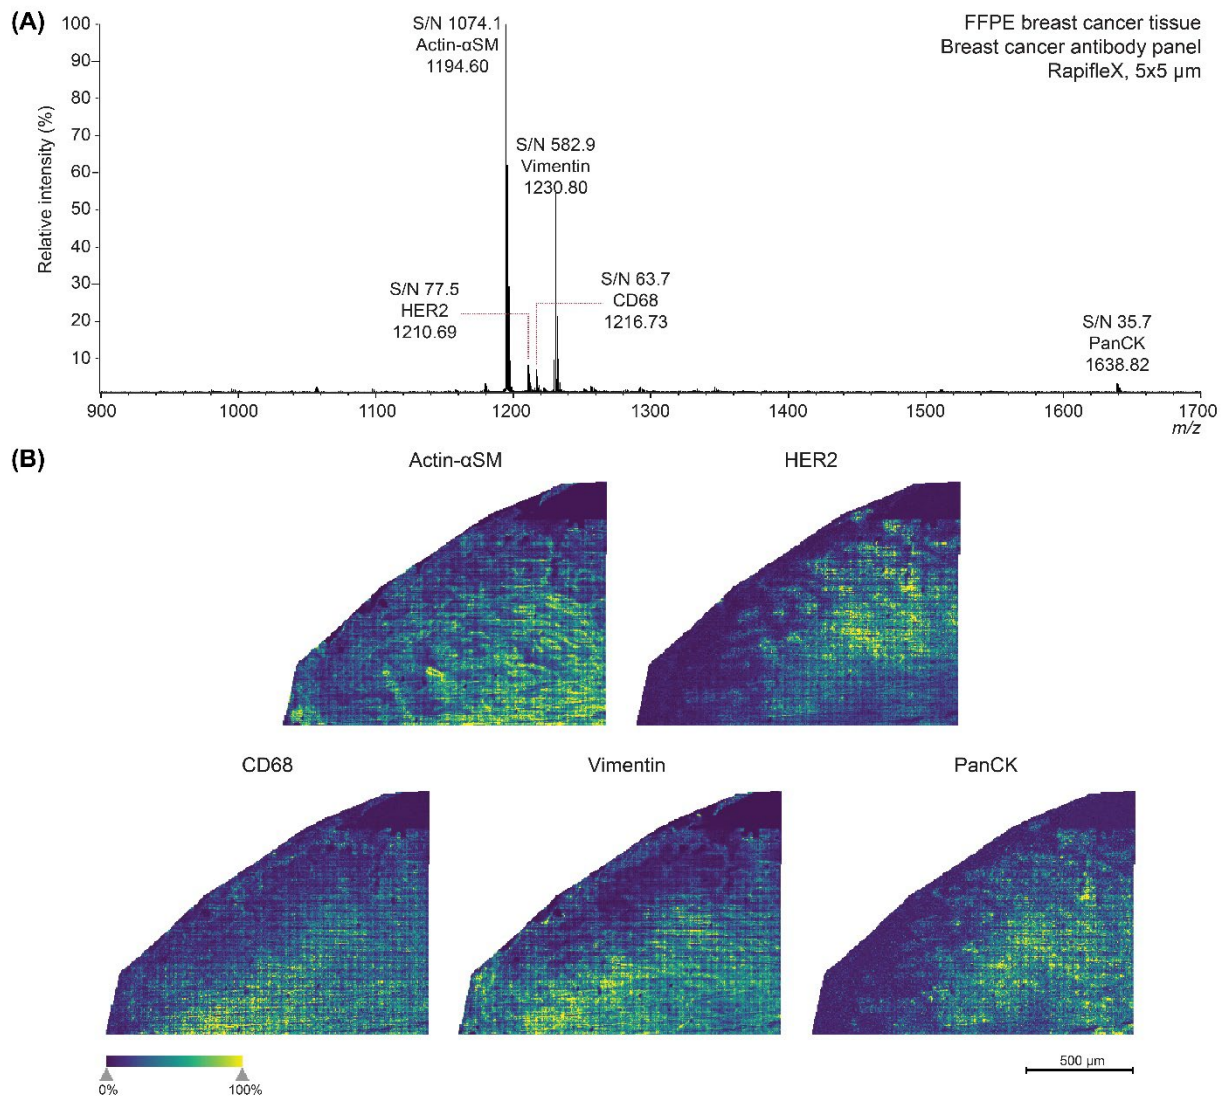

**Figure S3:** Multiplex MALDI-IHC on the rapifleX at 5x5  $\mu$ m spatial resolution. (A) Spectrum of the MALDI-IHC measurement with the breast cancer antibody panel. Five out of six peptide mass reporters were detected. The spectrum was TIC normalized and baseline corrected. (B) Single-ion images of the five mass reporters were detected, which were actin- $\alpha$ SM, HER2, CD68, vimentin, and panCK, respectively. After optimization of the laser shots and frequency, oversampling could be avoided. However, a rastering pattern is still visible in the images due to the stage movement.

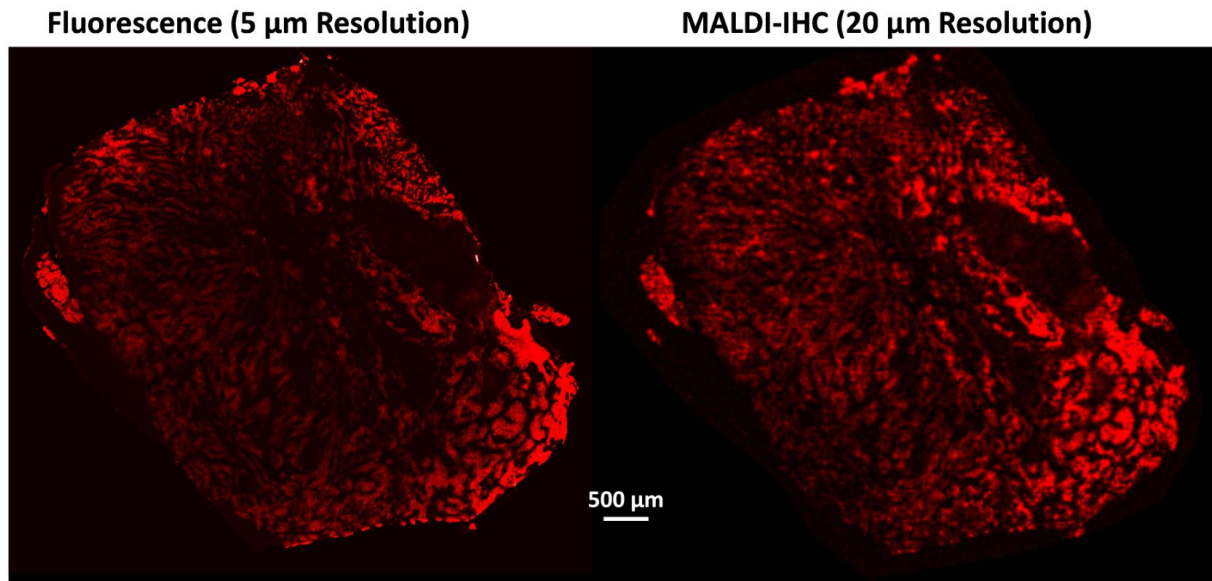

**Figure S4:** Comparison of HER2 fluorescent and MALDI-IHC images from the same tissue section stained using the six PC-MT antibody probes, of which the HER2 probe was dual-labeled with both a fluorophore and PC-MT (Table S2). The FFPE breast cancer tissue specimen was from Patient 2 (HER2+) and whole tissue section imaging was performed (note fluorescence imaging was performed at 5  $\mu\text{m}$  resolution on a GenePix 4200A microarray scanner, Molecular Devices, San Jose, CA).

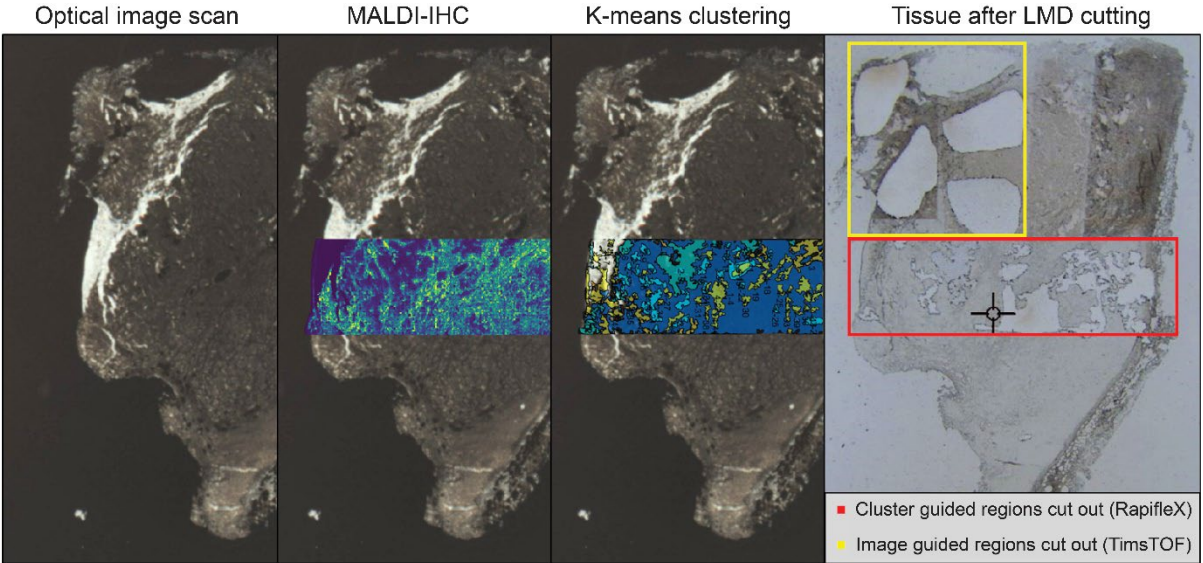

**Figure S5:** MALDI-IHC guided LMD overview. Visualization of each step from the optical image (panel 1) and MALDI-IHC (panel 2) to segmentation (panel 3) and laser-capture microdissection based on segmentation (panel 4).

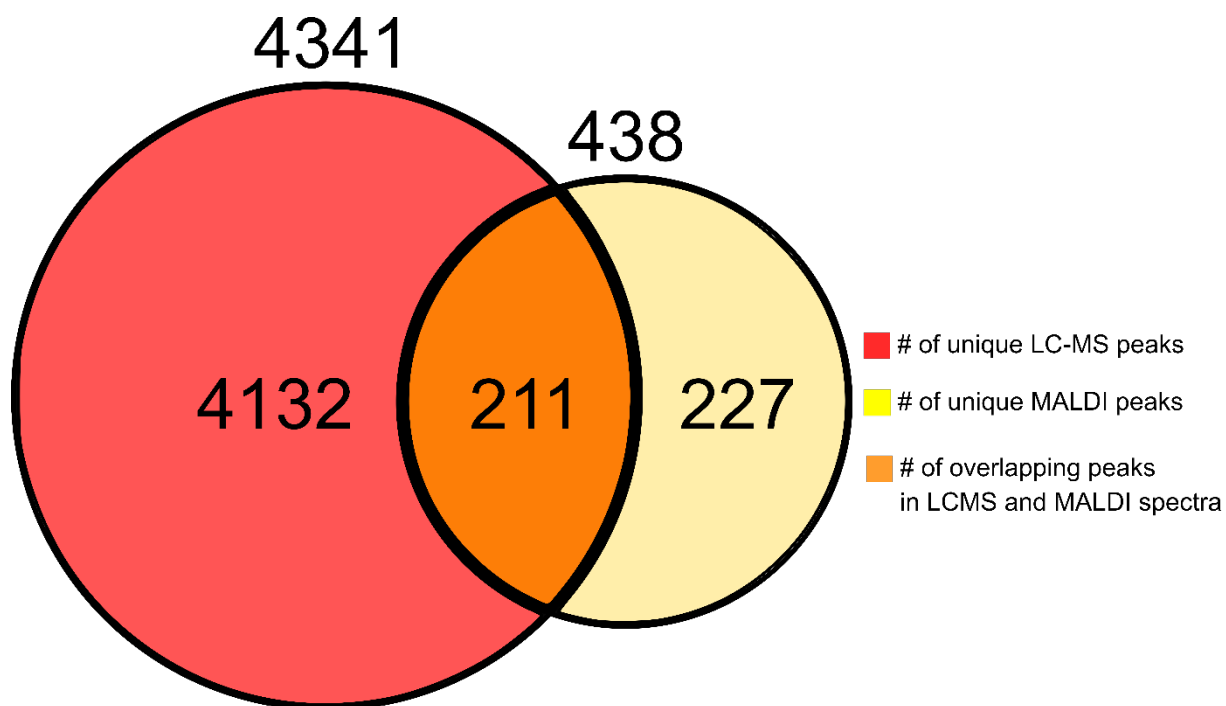

**Figure S6:** Venn diagram of the number of peaks detected with the different bottom-up approaches. With LMD followed by LC-MS, 4132 unique peaks were identified and correlated with peptides after data analysis, while the on-tissue digestion showed 227 unique peaks after peak picking. In total for both approaches, 4341 and 438 peaks were detected respectively, while comparing the two approaches, there was an overlap of 211 peptide masses, considering a +/- 20 ppm window.
